# Supplementary material
Source: PubMed Central journal article supplement (PMC9391281)
Supplement: NIHMS1815335-supplement-Supplementary_Appendix_1.pdf [file NIHMS1815335-supplement-Supplementary_Appendix_1.pdf]

**Supplementary Appendix 1. Original versus Modified Global Trigger Tool.** Surgical, Perinatal, and Emergency Department module triggers were eliminated because they do not apply to the oncology patient population. Only two Intensive Care Module Triggers that applied to the oncology patient population were retained.

\*indicates trigger was eliminated in modified Global Trigger Tool

| <b>Original Global Trigger Tool</b>   |                                            |
|---------------------------------------|--------------------------------------------|
| <b>Care Module Trigger</b>            |                                            |
| C1                                    | Transfusion or use of blood products       |
| C2                                    | Code/arrest/rapid response team            |
| C3                                    | Acute Dialysis                             |
| C4                                    | Positive Blood Culture                     |
| C5                                    | X-Ray or Doppler Studies for Emboli or DVT |
| C6                                    | Decrease of greater than 25% in            |
| C7                                    | Patient Fall                               |
| C8                                    | Pressure Ulcers                            |
| C9                                    | Readmission within 30 Days                 |
| C10                                   | Restraint Use                              |
| C11                                   | Healthcare-Associated Infections           |
| C12                                   | In-Hospital Stroke                         |
| C13                                   | Transfer to Higher Level of Care           |
| C14                                   | Any Procedure Complication                 |
| C15                                   | Other                                      |
| <b>Medical Module Trigger</b>         |                                            |
| M1                                    | Clostridium Difficile Positive Stool       |
| M2                                    | Partial Thromboplastin Time Greater        |
| M3                                    | International Normalized Ratio (INR)       |
| M4                                    | Glucose less than 50 mg/dl                 |
| M5                                    | Rising BUN or Serum Creatinine Greater     |
| M6                                    | Vitamin K Administration                   |
| M7                                    | Benadryl (Diphenhydramine) Use             |
| M8                                    | Romazicon (Flumazenil) Use                 |
| M9                                    | Naloxone (Narcan) Use                      |
| M10                                   | Anti-emetic Use                            |
| M11                                   | Over-Sedation/Hypotension                  |
| M12                                   | Abrupt Medication Stop                     |
| M13                                   | Other                                      |
| <b>Intensive Care Module Triggers</b> |                                            |
| I1                                    | Pneumonia Onset                            |
| I2*                                   | Readmission to Intensive Care              |
| I3                                    | In-Unit Procedure                          |
| I4*                                   | Intubation/Reintubation                    |

| <b>Surgical Module Triggers</b>             |                                                                                                                               |
|---------------------------------------------|-------------------------------------------------------------------------------------------------------------------------------|
| S1*                                         | Return to Surgery                                                                                                             |
| S2*                                         | Change in Procedure                                                                                                           |
| S3*                                         | Admission to Intensive Care Post-Operatively                                                                                  |
| S4*                                         | Intubation or Reintubation or Use of BiPap in Post Anesthesia Care Unit                                                       |
| S5*                                         | X-Ray Intra-Operatively or in Post Anesthesia Care Unit                                                                       |
| S6*                                         | Intra- or Post-Operative Death                                                                                                |
| S7*                                         | Mechanical Ventilation Greater than 24                                                                                        |
| S8*                                         | Intra-Operative Administration of Epinephrine, Norepinephrine,                                                                |
| S9*                                         | Post-Operative Increase in Troponin Levels Greater than 1.5 Nanogram/ml                                                       |
| S10*                                        | Injury, Repair, or Removal of Organ During Operative Procedure                                                                |
| S11*                                        | Occurrence of Any Operative Complication                                                                                      |
| <b>Perinatal Module Triggers</b>            |                                                                                                                               |
| P1*                                         | Terbutaline Use                                                                                                               |
| P2*                                         | 3rd- or 4th-Degree Lacerations                                                                                                |
| P3*                                         | Platelet Count Less than 50,000                                                                                               |
| P4*                                         | Estimated Blood Loss Greater than 500 ml for Vaginal Delivery, or Greater than                                                |
| P5*                                         | Specialty Consult                                                                                                             |
| P6*                                         | Administration of Oxytocic Agents (such as oxytocin, methylergonovine, and 15-methyl-prostaglandin in the post-partum period) |
| P7*                                         | Instrumented Delivery                                                                                                         |
| P8*                                         | Administration of General Anesthesia                                                                                          |
| <b>Emergency Department Module Triggers</b> |                                                                                                                               |
| E1*                                         | Readmission to the ED within 48 Hours                                                                                         |
| E2*                                         | Time in ED Greater than 6 Hours                                                                                               |

| <b>Modified Global Trigger Tool</b>   |                                            |
|---------------------------------------|--------------------------------------------|
| <b>Care Module Trigger</b>            |                                            |
| C1                                    | Transfusion or use of blood products       |
| C2                                    | Code/arrest/rapid response team            |
| C3                                    | Acute Dialysis                             |
| C4                                    | Positive Blood Culture                     |
| C5                                    | X-Ray or Doppler Studies for Emboli or DVT |
| C6                                    | Decrease of greater than 25% in            |
| C7                                    | Patient Fall                               |
| C8                                    | Pressure Ulcers                            |
| C9                                    | Readmission within 30 Days                 |
| C10                                   | Restraint Use                              |
| C11                                   | Healthcare-Associated Infections           |
| C12                                   | In-Hospital Stroke                         |
| C13                                   | Transfer to Higher Level of Care           |
| C14                                   | Any Procedure Complication                 |
| C15                                   | Other                                      |
| <b>Medical Module Trigger</b>         |                                            |
| M1                                    | Clostridium Difficile Positive Stool       |
| M2                                    | Partial Thromboplastin Time Greater        |
| M3                                    | International Normalized Ratio (INR)       |
| M4                                    | Glucose less than 50 mg/dl                 |
| M5                                    | Rising BUN or Serum Creatinine Greater     |
| M6                                    | Vitamin K Administration                   |
| M7                                    | Benadryl (Diphenhydramine) Use             |
| M8                                    | Romazicon (Flumazenil) Use                 |
| M9                                    | Naloxone (Narcan) Use                      |
| M10                                   | Anti-emetic Use                            |
| M11                                   | Over-Sedation/Hypotension                  |
| M12                                   | Abrupt Medication Stop                     |
| M13                                   | Other                                      |
| <b>Intensive Care Module Triggers</b> |                                            |
| I1                                    | Pneumonia Onset                            |
| I3                                    | In-Unit Procedure                          |
